# Supplementary material for: Intercluster B–H and B–B aggregation in iso- and trans-[B20H18]2−. Spherical aromaticity in borane dimers
Source: Royal Society of Chemistry journal article supplement (doi:10.1039/d4dt01699h), 2024-01-01
Supplement: d4dt01699h1.pdf [file d4dt01699h1.pdf]

Supporting information for:

## **Intercluster B-H and B-B Aggregation in *iso*- and *trans*-[B<sub>20</sub>H<sub>18</sub>]<sup>2-</sup>. Spherical Aromaticity in Borane Dimers**

Peter L. Rodríguez-Kessler,<sup>a</sup> Alvaro Muñoz-Castro<sup>b\*</sup>

<sup>a</sup>*Centro de Investigaciones en Óptica A.C., Loma del Bosque 115, Col. Lomas del Campestre, León, Guanajuato, 37150, Mexico.*

<sup>b</sup>*Facultad de Ingeniería, Arquitectura y Diseño, Universidad San Sebastián, Bellavista 7, Santiago, 8420524, Chile.*

### Content

Table S1. Energy decomposition analysis of the overall formation energy for both *iso*- and *trans*-[B<sub>20</sub>H<sub>18</sub>]<sup>2-</sup>, and the respective energy differences. Page S2

Figure S1. Orientation of the <sup>11</sup>B-NMR tensors according to their individual principal axis system (PAS), with the most shielding component denoted as longer arrows. Page S3

Table S2. Calculated and experimental <sup>11</sup>B-NMR parameters, and the related chemical shift anisotropy (CSA) in terms of the absolute shielding tensor ( $\sigma_{ij}$ ). Page S3

Table S1. Energy decomposition analysis of the overall formation energy for both *iso*- and *trans*-[B<sub>20</sub>H<sub>18</sub>]<sup>2-</sup>, and the respective energy differences. Values in kcal/mol. Relative energy differences in both kcal/mol and kJ/mol.

|                            | <i>iso</i> -[B <sub>20</sub> H <sub>18</sub> ] <sup>2-</sup> | <i>trans</i> -[B <sub>20</sub> H <sub>18</sub> ] <sup>2-</sup> |                                  | kcal/mol | kJ/mol |
|----------------------------|--------------------------------------------------------------|----------------------------------------------------------------|----------------------------------|----------|--------|
| $\Delta E_{\text{Pauli}}$  | 19679.5                                                      | 19625.6                                                        | $\Delta\Delta E_{\text{Pauli}}$  | 53.9     | 225.5  |
| $\Delta E_{\text{elstat}}$ | -4336.8                                                      | -4302.7                                                        | $\Delta\Delta E_{\text{elstat}}$ | -34.1    | -142.5 |
| $\Delta E_{\text{orb}}$    | -19851.4                                                     | -19836.7                                                       | $\Delta\Delta E_{\text{orb}}$    | -14.7    | -61.3  |
| $\Delta E_{\text{disp}}$   | -70.6                                                        | -70.9                                                          | $\Delta\Delta E_{\text{disp}}$   | 0.4      | 1.6    |
|                            |                                                              |                                                                |                                  |          |        |
| $\Delta E_{\text{int}}$    | -4579.2                                                      | -4584.7                                                        | $\Delta\Delta E_{\text{int}}$    | 5.6      | 23.3   |

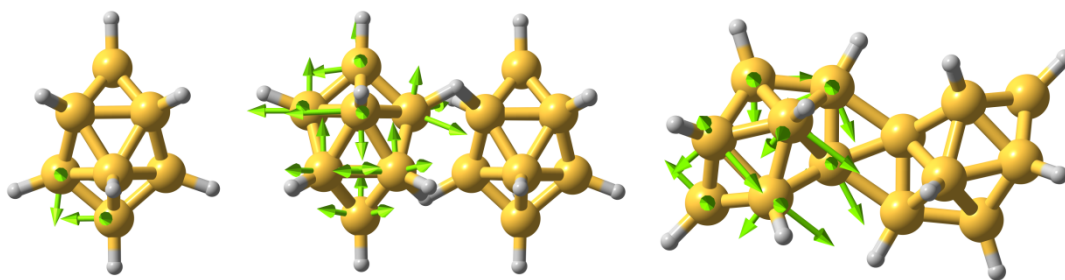

Figure S1. Orientation of the  $^{11}\text{B}$ -NMR tensors according to their individual principal axis system (PAS), with the most shielding component denoted as longer arrows

Table S2. Calculated and experimental  $^{11}\text{B}$ -NMR parameters, and the related chemical shift anisotropy (CSA) in terms of the absolute shielding tensor ( $\sigma_{ij}$ ). Values in ppm. For details of calculation for  $^{11}\text{B}$ -NMR chemical shifts, see main text.

| $closo\text{-}[\text{B}_{10}\text{H}_{10}]^{2-}$ | $\sigma_{11}$ | $\sigma_{22}$ | $\sigma_{33}$ | $\sigma_{iso}$ | $\delta^{calc}$ | $\delta^{exp}$ |
|--------------------------------------------------|---------------|---------------|---------------|----------------|-----------------|----------------|
| B                                                | 112.93        | 141.54        | 170.27        | 141.58         | -28.46          | -27.41         |
| B                                                | 97.36         | 119.34        | 119.44        | 112.05         | 1.07            | 1.56           |
| $iso\text{-}[\text{B}_{20}\text{H}_{18}]^{2-}$   |               |               |               |                |                 |                |
| B                                                | 115.97        | 139.22        | 162.69        | 139.30         | -26.18          | -26.01         |
| B                                                | 106.42        | 144.11        | 162.70        | 137.75         | -24.63          | -24.64         |
| B                                                | 107.72        | 130.44        | 172.37        | 136.84         | -23.72          | -22.63         |
| B                                                | 102.42        | 118.06        | 121.33        | 113.94         | -0.82           | -1.48          |
| $trans\text{-}[\text{B}_{20}\text{H}_{18}]^{2-}$ |               |               |               |                |                 |                |
| B                                                | 113.13        | 126.72        | 172.22        | 137.36         | -24.24          | -24.26         |
| B                                                | 106.00        | 126.63        | 158.89        | 130.50         | -17.38          | -17.99         |
| B                                                | 97.27         | 118.35        | 168.87        | 128.17         | -15.05          | -14.49         |
| B                                                | 95.64         | 100.58        | 175.16        | 123.79         | -10.67          | -10.99         |
| B                                                | 94.64         | 129.06        | 130.18        | 117.96         | -4.84           | -5.54          |
| B                                                | 69.63         | 82.28         | 136.08        | 96.00          | 17.12           | 17.41          |
| B                                                | 45.62         | 79.48         | 116.34        | 80.48          | 32.64           | 31.74          |
|                                                  |               |               |               |                |                 |                |

Experimental values for  $closo\text{-}[\text{B}_{10}\text{H}_{10}]^{2-}$  from reference <sup>1</sup>. Experimental values for both  $iso\text{-}$  and  $trans\text{-}[\text{B}_{20}\text{H}_{18}]^{2-}$  isomers from reference <sup>2</sup>.

## References

- 1 S. Kapuściński, M. B. Abdulmojeed, T. E. Schafer, A. Pietrzak, O. Hietsoi, A. C. Friedli and P. Kaszyński, *Inorg. Chem. Front.*, 2021, **8**, 1066–1082.
- 2 V. V. Avdeeva, V. I. Privalov, A. S. Kubasov, S. E. Nikiforova, E. A. Malinina and N. T. Kuznetsov, *Inorganica Chim. Acta*, 2023, **555**, 121564.
